# Supplementary material for: Solar-energy-driven value-added oxidation processes
Source: Royal Society of Chemistry journal article supplement (doi:10.1039/d5nr05234c), 2026-01-01
Supplement: d5nr05234c1.pdf [file d5nr05234c1.pdf]

### Calculation of time and power consumption for 1 Nm<sup>3</sup> H<sub>2</sub> production.

Assuming the overpotential at 5mA cm<sup>-2</sup> on the HER side is 10mV as the state-of-the-art conditions.<sup>1</sup>

1 Nm<sup>3</sup> H<sub>2</sub> is equivalent to 44.587 mol H<sub>2</sub> (data from NIST database)<sup>2</sup>.

Amount of charge transferred is:

$$Q = 2Fn_{H_2} = 2 \times 96485 \times 44.6 \approx 8.6 \times 10^6 C$$

Energy consumption is:

$$E_{5\text{ mA cm}^{-2}} = Q \cdot U_{\text{cell @ } 5\text{ mA cm}^{-2}}$$

Whereas:

$$U_{\text{cell @ } 5\text{ mA cm}^{-2}} = E @ 5\text{ mA cm}^{-2} + \text{HER overpotential @ } 5\text{ mA cm}^{-2}$$

Time consumption is:

$$t = \frac{Q}{A \cdot J @ 1.23V \text{ vs. RHE}}$$

Where A is assumed to be 1 m<sup>2</sup>.

### Calculation of anode product value

Calculations are based on prices provided by chemAnalyst.<sup>3</sup>

|                       |           |             |
|-----------------------|-----------|-------------|
| O <sub>2</sub> price: | 345 \$/MT | 0.345 \$/kg |
|-----------------------|-----------|-------------|

|                                      |           |             |
|--------------------------------------|-----------|-------------|
| H <sub>2</sub> O <sub>2</sub> price: | 410 \$/MT | 0.410 \$/kg |
|--------------------------------------|-----------|-------------|

|                           |           |             |
|---------------------------|-----------|-------------|
| CH <sub>3</sub> OH price: | 315 \$/MT | 0.315 \$/kg |
|---------------------------|-----------|-------------|

Amount of anodic product is estimated with faradaic efficiency of 1:

|                        |          |         |
|------------------------|----------|---------|
| O <sub>2</sub> amount: | 22.3 mol | 0.71 kg |
|------------------------|----------|---------|

|                                       |          |         |
|---------------------------------------|----------|---------|
| H <sub>2</sub> O <sub>2</sub> amount: | 44.6 mol | 1.51 kg |
|---------------------------------------|----------|---------|

|                            |          |         |
|----------------------------|----------|---------|
| CH <sub>3</sub> OH amount: | 44.6 mol | 1.43 kg |
|----------------------------|----------|---------|

Value of anodic product is:

|                        |         |
|------------------------|---------|
| O <sub>2</sub> amount: | 0.25 \$ |
|------------------------|---------|

H<sub>2</sub>O<sub>2</sub> amount: 0.62 \$

CH<sub>3</sub>OH amount: 0.45 \$

#### References:

1. H. Zhang, K. Chi, L. Qiao, P. Gao, Z. Li, X. Guo, Z. Li, D. Cao and D. Cheng, Boosting Acidic Hydrogen Evolution Kinetics Induced by Weak Strain Effect in PdPt Alloy for Proton Exchange Membrane Water Electrolyzers, *Small*, 2024, **20**, e2406935.
2. NIST, NIST Standard Reference Database Number 69, <https://webbook.nist.gov/chemistry/>, (accessed 13/01/2026).
3. ChemAnalyst, Chemical Prices, <https://www.chemanalyst.com/Pricing/Pricingoverview>, (accessed 13/01/2026).
